# Supplementary material for: Dinitrogen Cleavage and Hydrogenation to Ammonia with a Uranium Complex
Source: Research Square preprint supplement (doi:10.21203/rs.3.rs-846715/v1), 2021-09-30

# checkCIF/PLATON report

You have not supplied any structure factors. As a result the full set of tests cannot be run.

THIS REPORT IS FOR GUIDANCE ONLY. IF USED AS PART OF A REVIEW PROCEDURE FOR PUBLICATION, IT SHOULD NOT REPLACE THE EXPERTISE OF AN EXPERIENCED CRYSTALLOGRAPHIC REFEREE.

No syntax errors found.      CIF dictionary      Interpreting this report

## Datablock: 1\_a

---

Bond precision:    C-C = 0.0125 A                      Wavelength=1.34139

Cell:                      a=14.084(3)              b=21.139(4)              c=25.582(5)  
                            alpha=90              beta=104.66(3)              gamma=90

Temperature:              190 K

|                | Calculated            | Reported              |
|----------------|-----------------------|-----------------------|
| Volume         | 7368(3)               | 7368(3)               |
| Space group    | P 21/n                | P 1 21/n 1            |
| Hall group     | -P 2yn                | -P 2yn                |
| Moiety formula | C51 H120 K2 N13 P6 U3 | C51 H120 K2 N13 P6 U3 |
| Sum formula    | C51 H120 K2 N13 P6 U3 | C51 H120 K2 N13 P6 U3 |
| Mr             | 1893.72               | 1893.70               |
| Dx,g cm-3      | 1.707                 | 1.707                 |
| Z              | 4                     | 4                     |
| Mu (mm-1)      | 15.509                | 14.982                |
| F000           | 3684.0                | 3684.0                |
| F000'          | 3651.70               |                       |
| h,k,lmax       | 16,25,30              | 16,25,30              |
| Nref           | 13520                 | 13485                 |
| Tmin,Tmax      | 0.207,0.224           | 0.321,0.751           |
| Tmin'          | 0.133                 |                       |

Correction method= # Reported T Limits: Tmin=0.321 Tmax=0.751  
AbsCorr = MULTI-SCAN

Data completeness= 0.997                      Theta(max)= 53.962

R(reflections)= 0.0328( 11830)              wR2(reflections)= 0.0813( 13485)

S = 1.030                      Npar= 714

---

The following ALERTS were generated. Each ALERT has the format

**test-name\_ALERT\_alert-type\_alert-level.**

Click on the hyperlinks for more details of the test.

---

### ● Alert level C

|                   |                                                  |              |
|-------------------|--------------------------------------------------|--------------|
| PLAT051_ALERT_1_C | Mu(calc) and Mu(CIF) Ratio Differs from 1.0 by . | 3.52 %       |
| PLAT220_ALERT_2_C | NonSolvent Resd 1 C Ueq(max)/Ueq(min) Range      | 3.3 Ratio    |
| PLAT222_ALERT_3_C | NonSolvent Resd 1 H Uiso(max)/Uiso(min) Range    | 4.8 Ratio    |
| PLAT242_ALERT_2_C | Low 'MainMol' Ueq as Compared to Neighbors of    | C19 Check    |
| PLAT242_ALERT_2_C | Low 'MainMol' Ueq as Compared to Neighbors of    | C28 Check    |
| PLAT242_ALERT_2_C | Low 'MainMol' Ueq as Compared to Neighbors of    | C40 Check    |
| PLAT342_ALERT_3_C | Low Bond Precision on C-C Bonds .....            | 0.01252 Ang. |
| PLAT360_ALERT_2_C | Short C(sp3)-C(sp3) Bond C22 - C23 .             | 1.40 Ang.    |
| PLAT420_ALERT_2_C | D-H Without Acceptor N1 --H1 .                   | Please Check |
| PLAT420_ALERT_2_C | D-H Without Acceptor N2 --H2 .                   | Please Check |
| PLAT420_ALERT_2_C | D-H Without Acceptor N3 --H3 .                   | Please Check |

---

### ● Alert level G

|                   |                                                                                    |               |
|-------------------|------------------------------------------------------------------------------------|---------------|
| ABSMU01_ALERT_1_G | Calculation of _exptl_absorpt_correction_mu not performed for this radiation type. |               |
| PLAT002_ALERT_2_G | Number of Distance or Angle Restraints on AtSite                                   | 3 Note        |
| PLAT003_ALERT_2_G | Number of Uiso or Uij Restrained non-H Atoms ...                                   | 13 Report     |
| PLAT007_ALERT_5_G | Number of Unrefined Donor-H Atoms .....                                            | 3 Report      |
| PLAT012_ALERT_1_G | No _shelx_res_checksum Found in CIF .....                                          | Please Check  |
| PLAT083_ALERT_2_G | SHELXL Second Parameter in WGHT Unusually Large                                    | 21.72 Why ?   |
| PLAT176_ALERT_4_G | The CIF-Embedded .res File Contains SADI Records                                   | 1 Report      |
| PLAT178_ALERT_4_G | The CIF-Embedded .res File Contains SIMU Records                                   | 1 Report      |
| PLAT187_ALERT_4_G | The CIF-Embedded .res File Contains RIGU Records                                   | 3 Report      |
| PLAT301_ALERT_3_G | Main Residue Disorder .....(Resd 1 )                                               | 1% Note       |
| PLAT412_ALERT_2_G | Short Intra XH3 .. XHn H44A ..H42D .                                               | 2.01 Ang.     |
|                   | x,y,z =                                                                            | 1_555 Check   |
| PLAT412_ALERT_2_G | Short Intra XH3 .. XHn H44C ..H42D .                                               | 1.31 Ang.     |
|                   | x,y,z =                                                                            | 1_555 Check   |
| PLAT764_ALERT_4_G | Overcomplete CIF Bond List Detected (Rep/Expd) .                                   | 1.13 Ratio    |
| PLAT793_ALERT_4_G | Model has Chirality at P5 (Centro SPGR)                                            | S Verify      |
| PLAT793_ALERT_4_G | Model has Chirality at N7 (Centro SPGR)                                            | R Verify      |
| PLAT793_ALERT_4_G | Model has Chirality at N10 (Centro SPGR)                                           | R Verify      |
| PLAT793_ALERT_4_G | Model has Chirality at N13 (Centro SPGR)                                           | R Verify      |
| PLAT794_ALERT_5_G | Tentative Bond Valency for U1 (IV) .                                               | 3.99 Info     |
| PLAT794_ALERT_5_G | Tentative Bond Valency for U2 (IV) .                                               | 4.01 Info     |
| PLAT794_ALERT_5_G | Tentative Bond Valency for U3 (IV) .                                               | 4.00 Info     |
| PLAT860_ALERT_3_G | Number of Least-Squares Restraints .....                                           | 64 Note       |
| PLAT883_ALERT_1_G | No Info/Value for _atom_sites_solution_primary .                                   | Please Do !   |
| PLAT984_ALERT_1_G | The C-f' = 0.0148 Deviates from the B&C-Value                                      | 0.0137 Check  |
| PLAT984_ALERT_1_G | The K-f' = 0.3891 Deviates from the B&C-Value                                      | 0.3778 Check  |
| PLAT984_ALERT_1_G | The N-f' = 0.0253 Deviates from the B&C-Value                                      | 0.0241 Check  |
| PLAT984_ALERT_1_G | The P-f' = 0.2596 Deviates from the B&C-Value                                      | 0.2543 Check  |
| PLAT984_ALERT_1_G | The U-f' = -5.2580 Deviates from the B&C-Value                                     | -3.9641 Check |
| PLAT985_ALERT_1_G | The K-f" = 0.8535 Deviates from the B&C-Value                                      | 0.8310 Check  |
| PLAT985_ALERT_1_G | The P-f" = 0.3354 Deviates from the B&C-Value                                      | 0.3332 Check  |
| PLAT985_ALERT_1_G | The U-f" = 11.3041 Deviates from the B&C-Value                                     | 10.8496 Check |

---

0 **ALERT level A** = Most likely a serious problem - resolve or explain

0 **ALERT level B** = A potentially serious problem, consider carefully

11 **ALERT level C** = Check. Ensure it is not caused by an omission or oversight

30 **ALERT level G** = General information/check it is not something unexpected

12 ALERT type 1 CIF construction/syntax error, inconsistent or missing data

13 ALERT type 2 Indicator that the structure model may be wrong or deficient

4 ALERT type 3 Indicator that the structure quality may be low

8 ALERT type 4 Improvement, methodology, query or suggestion

4 ALERT type 5 Informative message, check

---

---

It is advisable to attempt to resolve as many as possible of the alerts in all categories. Often the minor alerts point to easily fixed oversights, errors and omissions in your CIF or refinement strategy, so attention to these fine details can be worthwhile. In order to resolve some of the more serious problems it may be necessary to carry out additional measurements or structure refinements. However, the purpose of your study may justify the reported deviations and the more serious of these should normally be commented upon in the discussion or experimental section of a paper or in the "special\_details" fields of the CIF. checkCIF was carefully designed to identify outliers and unusual parameters, but every test has its limitations and alerts that are not important in a particular case may appear. Conversely, the absence of alerts does not guarantee there are no aspects of the results needing attention. It is up to the individual to critically assess their own results and, if necessary, seek expert advice.

### **Publication of your CIF in IUCr journals**

A basic structural check has been run on your CIF. These basic checks will be run on all CIFs submitted for publication in IUCr journals (*Acta Crystallographica*, *Journal of Applied Crystallography*, *Journal of Synchrotron Radiation*); however, if you intend to submit to *Acta Crystallographica Section C* or *E* or *IUCrData*, you should make sure that full publication checks are run on the final version of your CIF prior to submission.

### **Publication of your CIF in other journals**

Please refer to the *Notes for Authors* of the relevant journal for any special instructions relating to CIF submission.

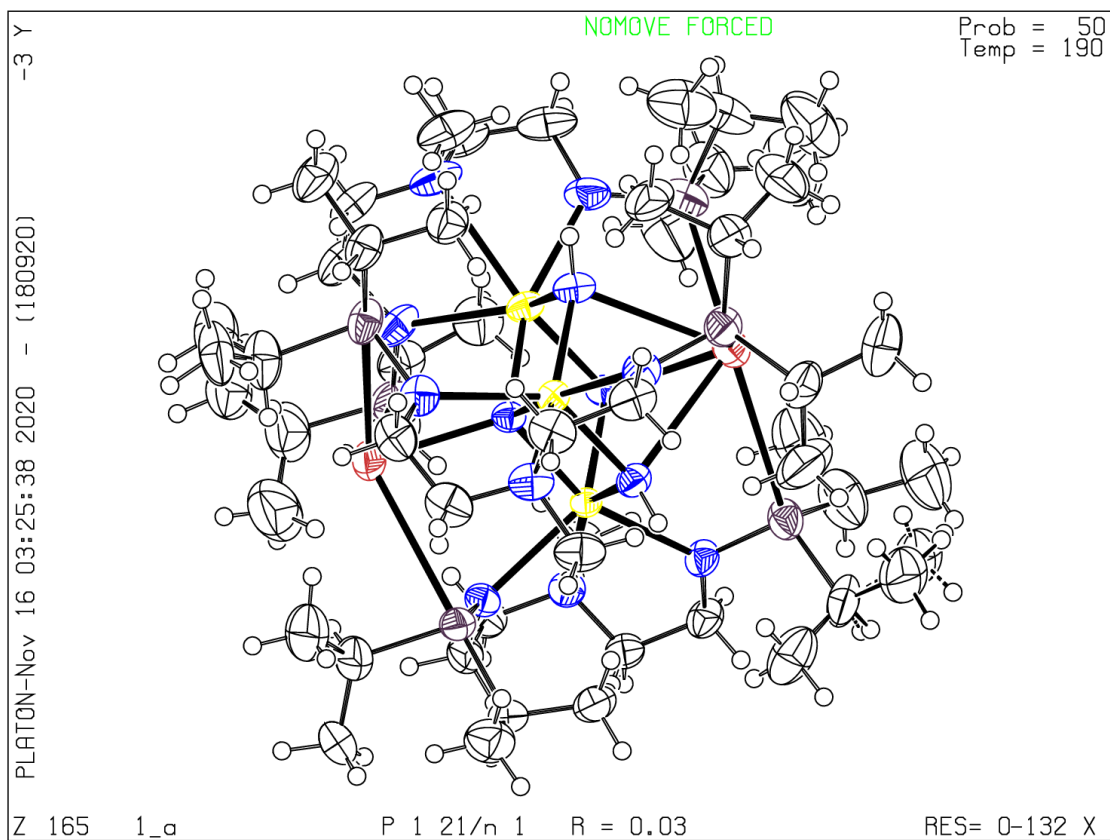

Supplement: Supplementary file 2 [file 76f02e272c7285662bcb63ce.pdf]
