# Supplementary material for: Dinitrogen Cleavage and Hydrogenation to Ammonia with a Uranium Complex
Source: Research Square preprint supplement (doi:10.21203/rs.3.rs-846715/v1), 2021-09-30

# checkCIF/PLATON report

Structure factors have been supplied for datablock(s) 1\_a

THIS REPORT IS FOR GUIDANCE ONLY. IF USED AS PART OF A REVIEW PROCEDURE FOR PUBLICATION, IT SHOULD NOT REPLACE THE EXPERTISE OF AN EXPERIENCED CRYSTALLOGRAPHIC REFEREE.

No syntax errors found.      CIF dictionary      Interpreting this report

## Datablock: 1\_a

---

|                 |                       |                                |
|-----------------|-----------------------|--------------------------------|
| Bond precision: | C-C = 0.0134 A        | Wavelength=1.34139             |
| Cell:           | a=14.0323(3)          | b=21.1682(4)      c=25.5817(5) |
|                 | alpha=90              | beta=104.430(1)      gamma=90  |
| Temperature:    | 193 K                 |                                |
|                 | Calculated            | Reported                       |
| Volume          | 7359.0(3)             | 7359.0(3)                      |
| Space group     | P 21/n                | P 21/n                         |
| Hall group      | -P 2yn                | -P 2yn                         |
| Moiety formula  | C51 H120 K2 N13 P6 U3 | ?                              |
| Sum formula     | C51 H120 K2 N13 P6 U3 | C51 H120 K2 N13 P6 U3          |
| Mr              | 1893.72               | 1893.70                        |
| Dx,g cm-3       | 1.709                 | 1.709                          |
| Z               | 4                     | 4                              |
| Mu (mm-1)       | 15.528                | 15.528                         |
| F000            | 3684.0                | 3684.0                         |
| F000'           | 3651.70               |                                |
| h,k,lmax        | 16,25,30              | 16,25,30                       |
| Nref            | 13467                 | 13433                          |
| Tmin,Tmax       | 0.265,0.212           | 0.418,0.751                    |
| Tmin'           | 0.169                 |                                |

Correction method= # Reported T Limits: Tmin=0.418 Tmax=0.751  
AbsCorr = MULTI-SCAN

Data completeness= 0.997      Theta(max)= 53.884

R(reflections)= 0.0349( 10333)      wR2(reflections)= 0.0743( 13433)

S = 1.006      Npar= 729

---

The following ALERTS were generated. Each ALERT has the format  
**test-name\_ALERT\_alert-type\_alert-level.**  
Click on the hyperlinks for more details of the test.

---

### ● Alert level C

|                   |                                           |                    |                                 |                     |         |        |        |
|-------------------|-------------------------------------------|--------------------|---------------------------------|---------------------|---------|--------|--------|
| PLAT220_ALERT_2_C | NonSolvent                                | Resd 1             | C                               | Ueq(max)/Ueq(min)   | Range   | 3.5    | Ratio  |
| PLAT222_ALERT_3_C | NonSolvent                                | Resd 1             | H                               | Uiso(max)/Uiso(min) | Range   | 5.0    | Ratio  |
| PLAT234_ALERT_4_C | Large Hirshfeld Difference                | P3                 | --C31                           | .                   |         | 0.16   | Ang.   |
| PLAT234_ALERT_4_C | Large Hirshfeld Difference                | C16                | --C17                           | .                   |         | 0.19   | Ang.   |
| PLAT234_ALERT_4_C | Large Hirshfeld Difference                | C22                | --C23                           | .                   |         | 0.17   | Ang.   |
| PLAT234_ALERT_4_C | Large Hirshfeld Difference                | C31                | --C32                           | .                   |         | 0.22   | Ang.   |
| PLAT234_ALERT_4_C | Large Hirshfeld Difference                | C37                | --C39                           | .                   |         | 0.22   | Ang.   |
| PLAT234_ALERT_4_C | Large Hirshfeld Difference                | C43                | --C44                           | .                   |         | 0.17   | Ang.   |
| PLAT241_ALERT_2_C | High                                      | 'MainMol'          | Ueq as Compared to Neighbors of |                     | C37     | Check  |        |
| PLAT242_ALERT_2_C | Low                                       | 'MainMol'          | Ueq as Compared to Neighbors of |                     | P4      | Check  |        |
| PLAT242_ALERT_2_C | Low                                       | 'MainMol'          | Ueq as Compared to Neighbors of |                     | C16     | Check  |        |
| PLAT242_ALERT_2_C | Low                                       | 'MainMol'          | Ueq as Compared to Neighbors of |                     | C19     | Check  |        |
| PLAT242_ALERT_2_C | Low                                       | 'MainMol'          | Ueq as Compared to Neighbors of |                     | C31     | Check  |        |
| PLAT242_ALERT_2_C | Low                                       | 'MainMol'          | Ueq as Compared to Neighbors of |                     | C40     | Check  |        |
| PLAT242_ALERT_2_C | Low                                       | 'MainMol'          | Ueq as Compared to Neighbors of |                     | C43     | Check  |        |
| PLAT342_ALERT_3_C | Low Bond Precision on                     | C-C Bonds          | .....                           |                     | 0.01337 | Ang.   |        |
| PLAT360_ALERT_2_C | Short                                     | C(sp3)-C(sp3) Bond | C37 - C39                       | .                   |         | 1.38   | Ang.   |
| PLAT390_ALERT_3_C | Deviating Methyl                          | C39                | X-C-H Bond Angle                | ...                 |         | 103    | Degree |
| PLAT412_ALERT_2_C | Short Intra XH3 .. XHn                    | H17C               | ..H20A                          | .                   |         | 1.89   | Ang.   |
|                   |                                           |                    | x,y,z =                         |                     | 1_555   | Check  |        |
| PLAT412_ALERT_2_C | Short Intra XH3 .. XHn                    | H29C               | ..H32A                          | .                   |         | 1.88   | Ang.   |
|                   |                                           |                    | x,y,z =                         |                     | 1_555   | Check  |        |
| PLAT412_ALERT_2_C | Short Intra XH3 .. XHn                    | H37A               | ..H39C                          | .                   |         | 1.88   | Ang.   |
|                   |                                           |                    | x,y,z =                         |                     | 1_555   | Check  |        |
| PLAT420_ALERT_2_C | D-H Without Acceptor                      | N1                 | --H1                            | .                   |         | Please | Check  |
| PLAT420_ALERT_2_C | D-H Without Acceptor                      | N2                 | --H2                            | .                   |         | Please | Check  |
| PLAT420_ALERT_2_C | D-H Without Acceptor                      | N3                 | --H3                            | .                   |         | Please | Check  |
| PLAT906_ALERT_3_C | Large K Value in the Analysis of Variance | .....              |                                 |                     | 2.158   | Check  |        |
| PLAT911_ALERT_3_C | Missing FCF Refl Between Thmin & STh/L=   | 0.600              |                                 |                     | 20      | Report |        |
| PLAT976_ALERT_2_C | Check Calcd Resid. Dens.                  | 0.98A              | From N1                         |                     | -0.52   | eA-3   |        |
| PLAT977_ALERT_2_C | Check Negative Difference Density on      | H1                 |                                 |                     | -0.47   | eA-3   |        |
| PLAT977_ALERT_2_C | Check Negative Difference Density on      | H3                 |                                 |                     | -0.38   | eA-3   |        |
| PLAT977_ALERT_2_C | Check Negative Difference Density on      | H39B               |                                 |                     | -0.36   | eA-3   |        |

---

### ● Alert level G

|                   |                                                  |                     |                |    |       |        |  |
|-------------------|--------------------------------------------------|---------------------|----------------|----|-------|--------|--|
| ABSMU01_ALERT_1_G | Calculation of _exptl_absorpt_correction_mu      |                     |                |    |       |        |  |
|                   | not performed for this radiation type.           |                     |                |    |       |        |  |
| PLAT003_ALERT_2_G | Number of Uiso or Uij Restrained non-H Atoms ... |                     |                |    | 3     | Report |  |
| PLAT007_ALERT_5_G | Number of Unrefined Donor-H Atoms .....          |                     |                |    | 3     | Report |  |
| PLAT083_ALERT_2_G | SHELXL Second Parameter in WGHT Unusually Large  |                     |                |    | 11.53 | Why ?  |  |
| PLAT186_ALERT_4_G | The CIF-Embedded .res File Contains ISOR Records |                     |                |    | 1     | Report |  |
| PLAT232_ALERT_2_G | Hirshfeld Test Diff (M-X)                        | U1                  | --N1           | .  | 5.7   | s.u.   |  |
| PLAT232_ALERT_2_G | Hirshfeld Test Diff (M-X)                        | U1'                 | --N1           | .  | 8.3   | s.u.   |  |
| PLAT232_ALERT_2_G | Hirshfeld Test Diff (M-X)                        | U1'                 | --N2           | .  | 9.3   | s.u.   |  |
| PLAT232_ALERT_2_G | Hirshfeld Test Diff (M-X)                        | U1'                 | --N5           | .  | 6.3   | s.u.   |  |
| PLAT232_ALERT_2_G | Hirshfeld Test Diff (M-X)                        | U1'                 | --N6           | .  | 6.5   | s.u.   |  |
| PLAT232_ALERT_2_G | Hirshfeld Test Diff (M-X)                        | U2'                 | --N3           | .  | 9.0   | s.u.   |  |
| PLAT232_ALERT_2_G | Hirshfeld Test Diff (M-X)                        | U2'                 | --N8           | .  | 5.4   | s.u.   |  |
| PLAT232_ALERT_2_G | Hirshfeld Test Diff (M-X)                        | U2'                 | --N9           | .  | 7.0   | s.u.   |  |
| PLAT300_ALERT_4_G | Atom Site Occupancy of U1                        |                     | Constrained at |    | 0.98  | Check  |  |
| PLAT300_ALERT_4_G | Atom Site Occupancy of U2                        |                     | Constrained at |    | 0.98  | Check  |  |
| PLAT300_ALERT_4_G | Atom Site Occupancy of U3                        |                     | Constrained at |    | 0.98  | Check  |  |
| PLAT300_ALERT_4_G | Atom Site Occupancy of U1'                       |                     | Constrained at |    | 0.02  | Check  |  |
| PLAT300_ALERT_4_G | Atom Site Occupancy of U2'                       |                     | Constrained at |    | 0.02  | Check  |  |
| PLAT300_ALERT_4_G | Atom Site Occupancy of U3'                       |                     | Constrained at |    | 0.02  | Check  |  |
| PLAT301_ALERT_3_G | Main Residue Disorder .....                      | (Resd 1 )           |                |    | 4%    | Note   |  |
| PLAT764_ALERT_4_G | Overcomplete CIF Bond List Detected (Rep/Expd)   |                     |                |    | 1.25  | Ratio  |  |
| PLAT774_ALERT_1_G | Check                                            | X-Y Bond in CIF: K1 | --U2'          | .. | 4.24  | Ang.   |  |
| PLAT774_ALERT_1_G | Check                                            | X-Y Bond in CIF: K1 | --U3'          | .. | 4.32  | Ang.   |  |

|                   |                                                  |       |              |
|-------------------|--------------------------------------------------|-------|--------------|
| PLAT779_ALERT_4_G | Suspect or Irrelevant (Bond) Angle(s) in CIF . # | 151   | Check        |
|                   | N12 -P6 -U3' 1.555 1.555 1.555                   | 32.70 | Deg.         |
| PLAT779_ALERT_4_G | Suspect or Irrelevant (Bond) Angle(s) in CIF . # | 601   | Check        |
|                   | K2 -C39 -H39C 1.555 1.555 1.555                  | 20.20 | Deg.         |
| PLAT793_ALERT_4_G | Model has Chirality at N7 (Centro SPGR)          | R     | Verify       |
| PLAT793_ALERT_4_G | Model has Chirality at N10 (Centro SPGR)         | R     | Verify       |
| PLAT793_ALERT_4_G | Model has Chirality at N13 (Centro SPGR)         | R     | Verify       |
| PLAT860_ALERT_3_G | Number of Least-Squares Restraints .....         | 18    | Note         |
| PLAT883_ALERT_1_G | No Info/Value for _atom_sites_solution_primary . |       | Please Do !  |
| PLAT912_ALERT_4_G | Missing # of FCF Reflections Above STh/L= 0.600  | 15    | Note         |
| PLAT913_ALERT_3_G | Missing # of Very Strong Reflections in FCF .... | 1     | Note         |
| PLAT941_ALERT_3_G | Average HKL Measurement Multiplicity .....       | 4.7   | Low          |
| PLAT965_ALERT_2_G | The SHELXL WEIGHT Optimisation has not Converged |       | Please Check |
| PLAT978_ALERT_2_G | Number C-C Bonds with Positive Residual Density. | 0     | Info         |

---

0 **ALERT level A** = Most likely a serious problem - resolve or explain  
 0 **ALERT level B** = A potentially serious problem, consider carefully  
 30 **ALERT level C** = Check. Ensure it is not caused by an omission or oversight  
 35 **ALERT level G** = General information/check it is not something unexpected

4 ALERT type 1 CIF construction/syntax error, inconsistent or missing data  
 31 ALERT type 2 Indicator that the structure model may be wrong or deficient  
 9 ALERT type 3 Indicator that the structure quality may be low  
 20 ALERT type 4 Improvement, methodology, query or suggestion  
 1 ALERT type 5 Informative message, check

---

It is advisable to attempt to resolve as many as possible of the alerts in all categories. Often the minor alerts point to easily fixed oversights, errors and omissions in your CIF or refinement strategy, so attention to these fine details can be worthwhile. In order to resolve some of the more serious problems it may be necessary to carry out additional measurements or structure refinements. However, the purpose of your study may justify the reported deviations and the more serious of these should normally be commented upon in the discussion or experimental section of a paper or in the "special\_details" fields of the CIF. checkCIF was carefully designed to identify outliers and unusual parameters, but every test has its limitations and alerts that are not important in a particular case may appear. Conversely, the absence of alerts does not guarantee there are no aspects of the results needing attention. It is up to the individual to critically assess their own results and, if necessary, seek expert advice.

### Publication of your CIF in IUCr journals

A basic structural check has been run on your CIF. These basic checks will be run on all CIFs submitted for publication in IUCr journals (*Acta Crystallographica*, *Journal of Applied Crystallography*, *Journal of Synchrotron Radiation*); however, if you intend to submit to *Acta Crystallographica Section C* or *E* or *IUCrData*, you should make sure that full publication checks are run on the final version of your CIF prior to submission.

### Publication of your CIF in other journals

Please refer to the *Notes for Authors* of the relevant journal for any special instructions relating to CIF submission.

Datablock 1\_a - ellipsoid plot

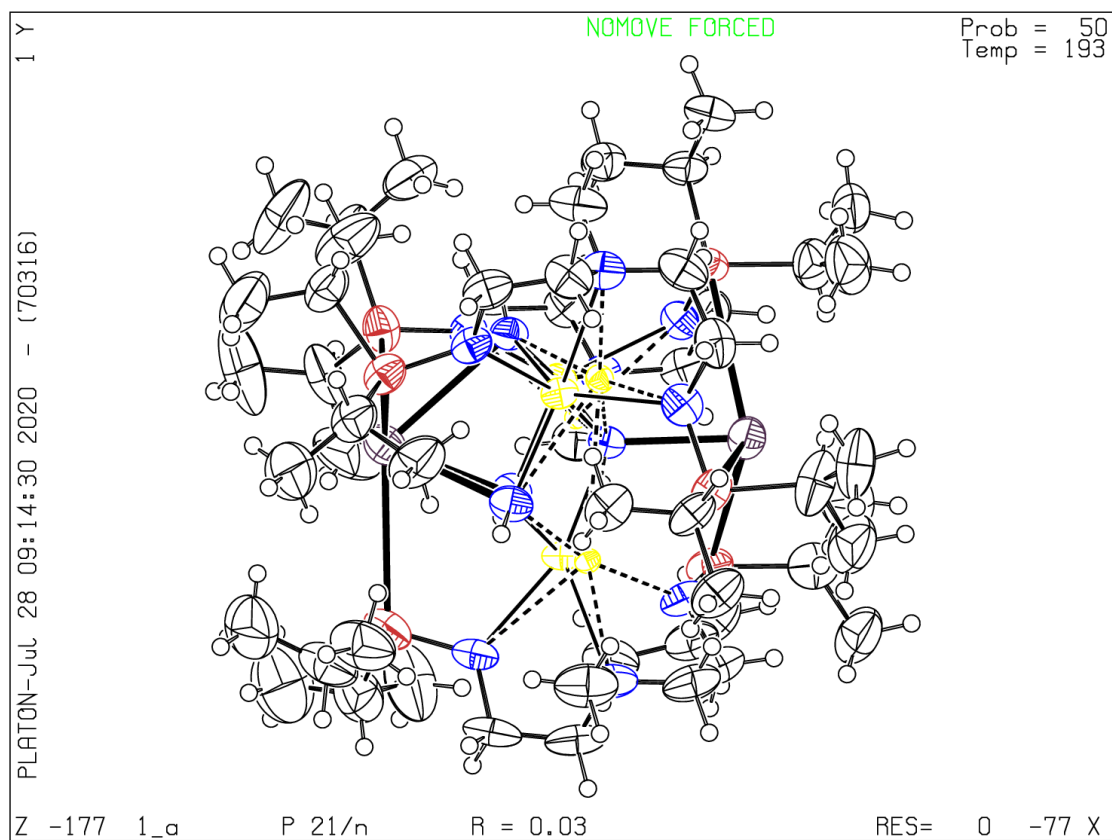

Supplement: Supplementary file 3 [file a8862d1685eb8941556d6a47.pdf]
